# Supplementary material
Source: publisher figshare collection journal article supplement (https://tandf.figshare.com/ndownloader/files/14623172)
Supplement: Supplementary file 1 [file 14623172]

**Table S1**. Putative South American lineages inferred with maximum-likelihood trees based on different portions of the S1 coding region of all South American strains available in GenBank, including Brazilian (n=222), Argentine (n=19), Colombian (n=17), Chilean (n=9) and Peruvian (n=2) strains. South American genotype or cluster name assigned in original publication are shown in parentheses.

| **S1 region analyzed*** | **Collection year** | **Country** | **Putative South American lineage** | **Reference** |
| --- | --- | --- | --- | --- |
| 1-571 | 2002-2006 | Brazil | GI-11 (Brazilian strains group) | Villarreal et al., 2007 |
| 720-1065 | 2007-2008 | Brazil | GI-1 (Massachusetts)  GI-11 (Brazil)  GI-13 (4/91-793B) | Villarreal et al., 2010 |
| 229-556 | 2003-2009 | Brazil | GI-1 (Massachusetts)  GI-11 (Cluster D207) | Felippe et al., 2010 |
| 1-536 | 2003-2009 | Brazil | GI-11 (Genotype BR I) | Chacón et al., 2011 |
| 1-567 | 2010-2011 | Brazil | GI-1 (Massachusetts)  GI-11 (BRI and BRII) | Fraga et al., 2013 |
| 1-520 | 2011-2015 | Brazil | GI-1 (Massachusetts)  GI-11 (BRI and BRII) | Carranza et al., 2017 |
| 1-528 | 1988-2000 | Brazil | GI-1  GI-9  GI-11 | Unpublished data (direct submission) |
| 50-540 | 2013 | Brazil | GI-1  GI-11 | Unpublished data (direct submission) |
| 134-722 | 2001-2008 | Argentina | GI-1 (Massachusetts and Connecticut)  GI-11 (Cluster B and C)  GI-16 (Cluster A) | Rimondi et al., 2009 |
| 1 – 310 | 2003 | Colombia | GI-1 (Massachusetts and Connecticut)  GI-16 (Genotype C)  (Genotype A)  (Genotype B)  (Genotype D) | Alvarado et al., 2005 |
| 730-1075 | 2008-2010 | Chile | GI-1 (Massachusetts)  GI-16 (Q1) | De Wit et al., 2017 |
| 79-705 | 2014 | Peru | GI-16 (A/SAII) | Tataje-Lavanda et al., 2016 |
| 739-1025 | 2013 | Peru | GI-16 | Unpublished data (direct submission) |

* Oligonucleotide position according to IBV strain M41 sequence (AY851295)

**Supplementary References**

Carranza, C., Astolfi-Ferreira, CS.., Santander Parra, S.H., Nuñez, L.F., Penzes, Z., Chacón, J.L., Sesti, L., Chacón, R.D., Piantino Ferreira, A.J. (2017). Genetic characterisation and analysis of infectious bronchitis virus isolated from Brazilian flocks between 2010 and 2015. *Br Poult Sci.* 58(6), 610-623.

de Wit, J., Dijkman, R., Guerrero, P., Calvo, J., Gonzalez, A., Hidalgo, H. (2017). [Variability in biological behaviour, pathogenicity, protectotype and induction of virus neutralizing antibodies by different vaccination programmes to infectious bronchitis virus genotype Q1 strains from Chile.](https://www.ncbi.nlm.nih.gov/pubmed/28660781) *Avian Pathol.* 46(6):666-675.

Felippe, A., Silva, L., Santos, M., Spilki, F., & Arns, C. (2010). Genetic Diversity of Avian Infectious Bronchitis Virus Isolated from Domestic Chicken Flocks and Coronaviruses from Feral Pigeons in Brazil Between 2003 and 2009. *Avian Dis.,* 54(4), 1191–1196.

Fraga, A.P., Balestrin, E., Ikuta, N., Fonseca, A.S., Spilki, F.R., Canal, C.W., Lunge, V.R. (2013). Emergence of a new genotype of avian infectious bronchitis virus in Brazil. *Avian Dis.* 57(2), 225–32.

Villarreal, A., Brandão, P., Chacón, J., Saidenberg, A., Assayag, M., Ferreira, A., Jones, A. (2007). Molecular Characterization of Infectious Bronchitis Virus Strains Isolated from the Enteric Contents of Brazilian Laying Hens and Broilers. *Avian Dis*., 51(4), 974–978.

Tataje-Lavanda, L., Montalvan, A., Bueno,C., Requena, D. and Fernandez-Diaz, M. (2016). First evidence of detection of Asia/South America II (A/SAII) infectious bronchitis virus in a commercial broiler flock in Peru. *Vet Rec Case Rep* 4 (1), e000292.
